# Supplementary material for: Microscopy studies of the nematic NTBphase of 1,11-di-(1′′-cyanobiphenyl-4-yl)undecane
Source: Royal Society of Chemistry journal article supplement (doi:10.1039/c3tc32137a), 2013-11-26
Supplement: c3tc32137a.pdf [file c3tc32137a.pdf]

**Microscopy Studies of the Nematic N<sub>TB</sub> Phase of 1,11-Di-(1"-Cyanobiphenyl-4-yl)undecane**

**Richard J Mandle, Edward J Davis, Craig T Archbold, Stephen J Cowling and John W Goodby**

**Supplementary Information**

Two video film clips of the free standing film of the N<sub>TB</sub> phase of 1,11-Di-(1"-Cyanobiphenyl-4-yl)undecane are appended in .wmv for PC format (FSF NTB2.wmv), and .mp4 for MacIntosh format (FSF NTB.mp4).
